# Supplementary material for: Genome-wide DNA methylation levels and altered cortisol stress reactivity following childhood trauma in humans
Source: PubMed Central journal article supplement (PMC4802173; doi:10.1038/ncomms10967), 2016-03-21
Supplement: ncomms10967-s1.pdf [file ncomms10967-s1.pdf]

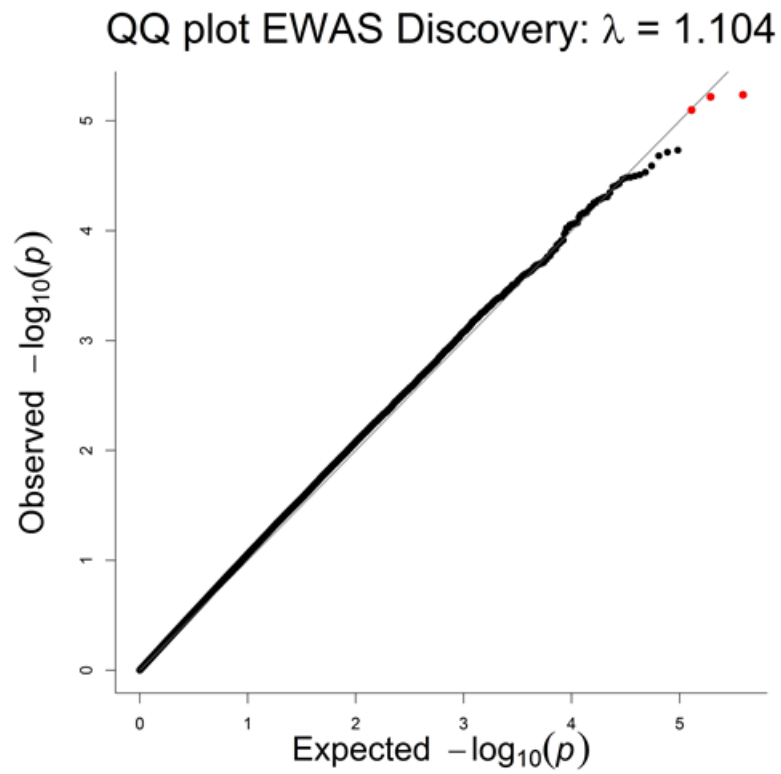

**Figure 1** QQplot showing the p-value distribution for the genome-wide cortisol stress reactivity analysis in the discovery sample (N=85). The three methylation loci for which replication was sought are denoted by red dots.

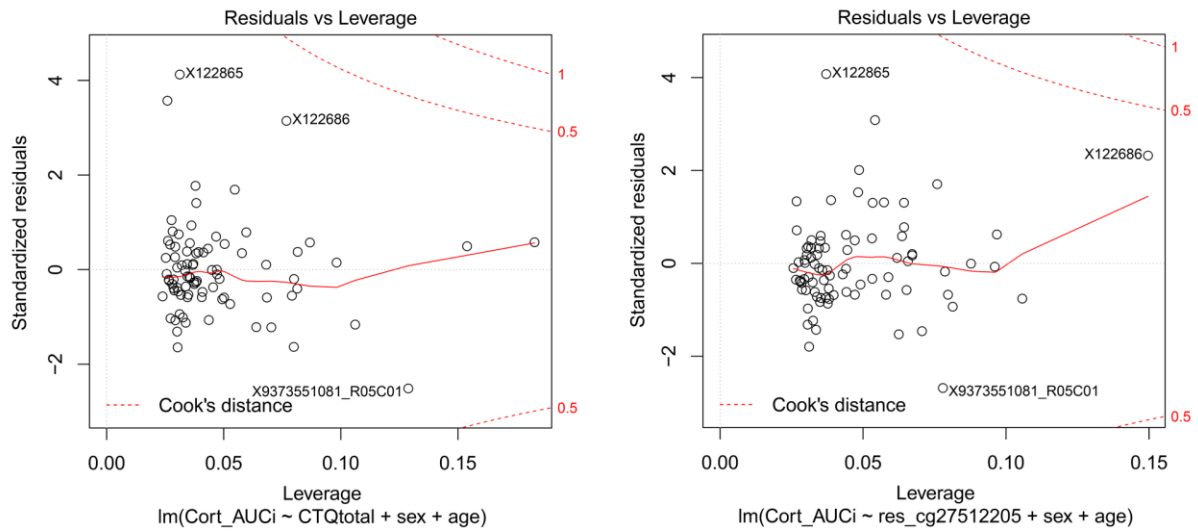

**Figure 2** Cook plot of the leverage and standardized residuals for the association between childhood trauma and cortisol stress reactivity (left panel) and for the association between methylation at the KITLG locus and cortisol stress reactivity (right panel) in the discovery sample (N=85).

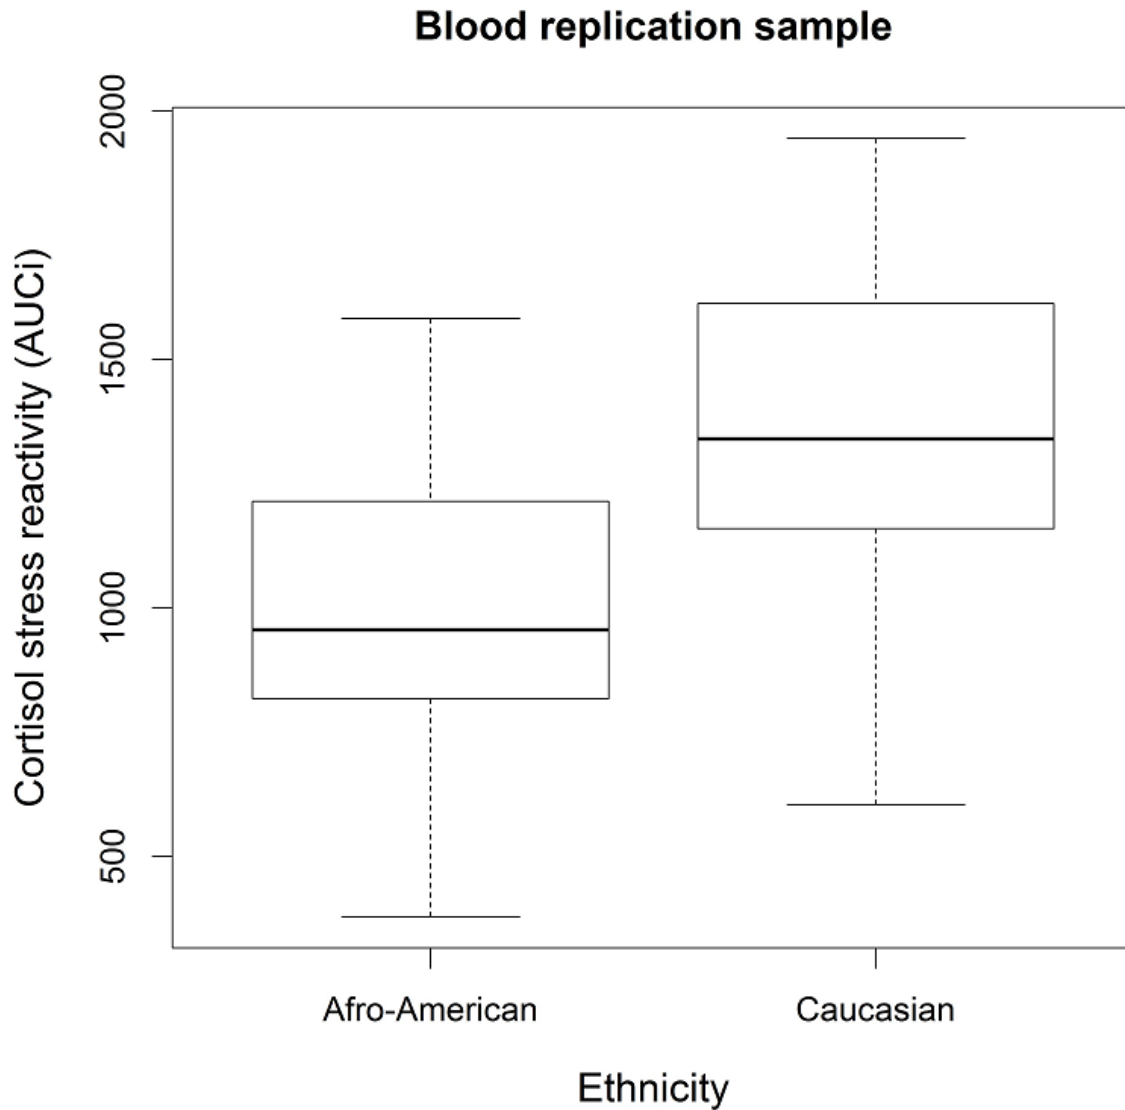

**Figure 3** Cortisol stress reactivity (AUCi) is significantly lower in Afro-American individuals (n=23) compared to Caucasian individuals (n=17) ( $p=0.002$  in a linear regression model). In this boxplot the whiskers extend to the most extreme data point which is no more than 1.5 times the length of the box away from the box. Abbreviations: AUCi= Area under the curve(AUC) with respect to the increase.

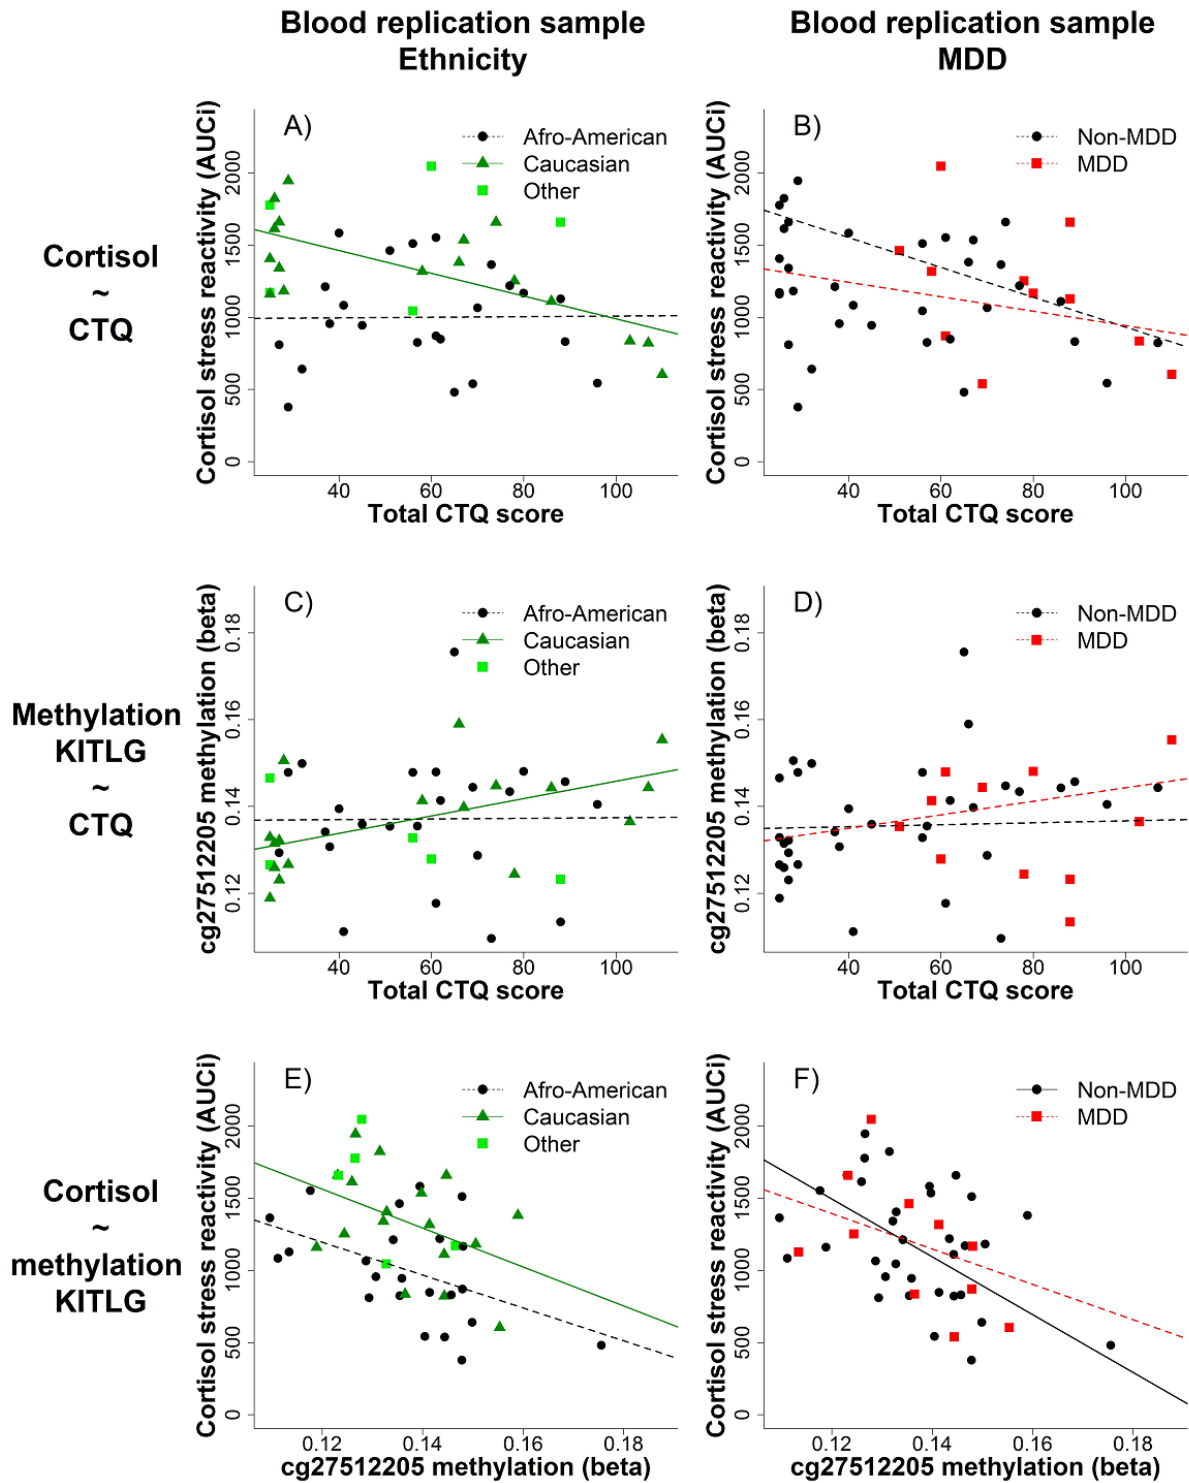

**Figure 4** Overview of the stratified analyses for ethnicity and current major depressive disorder (MDD) status in the replication sample (N=45). Significant correlations in linear regression models are present for the Caucasians (N=17; solid green lines in panels A, C, E) and for the non-MDD subjects (N=34; cortisol~methylation only; solid black line in panel F). Dashed lines indicate non-significant correlations. Abbreviations: CTQ= childhood trauma questionnaire, AUCi=Area under the curve (AUC) with respect to the increase.

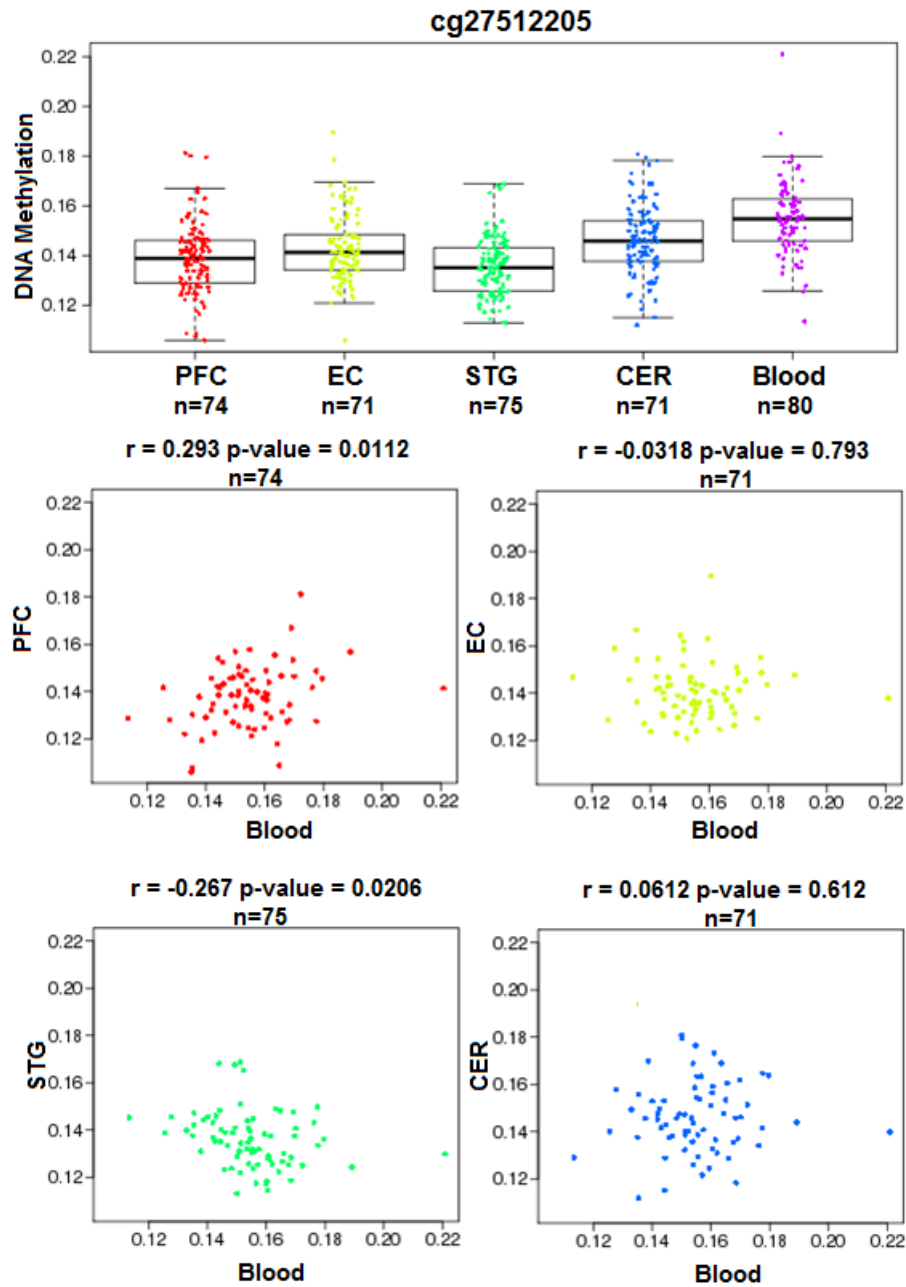

**Figure 5** Correlation of *KITLG* methylation levels at the cg27512205 locus in whole blood and four brain regions in a linear regression model. The top panel is a boxplot with the DNA methylation levels per tissue type. In this boxplot the whiskers extend to the most extreme data point which is no more than 1.5 times the length of the box away from the box. The prefrontal cortex (PFC; upper left panel), superior temporal gyrus (STG; lower left panel), entorhinal cortex (EC; upper right panel) and cerebellum (CER; lower right panel).

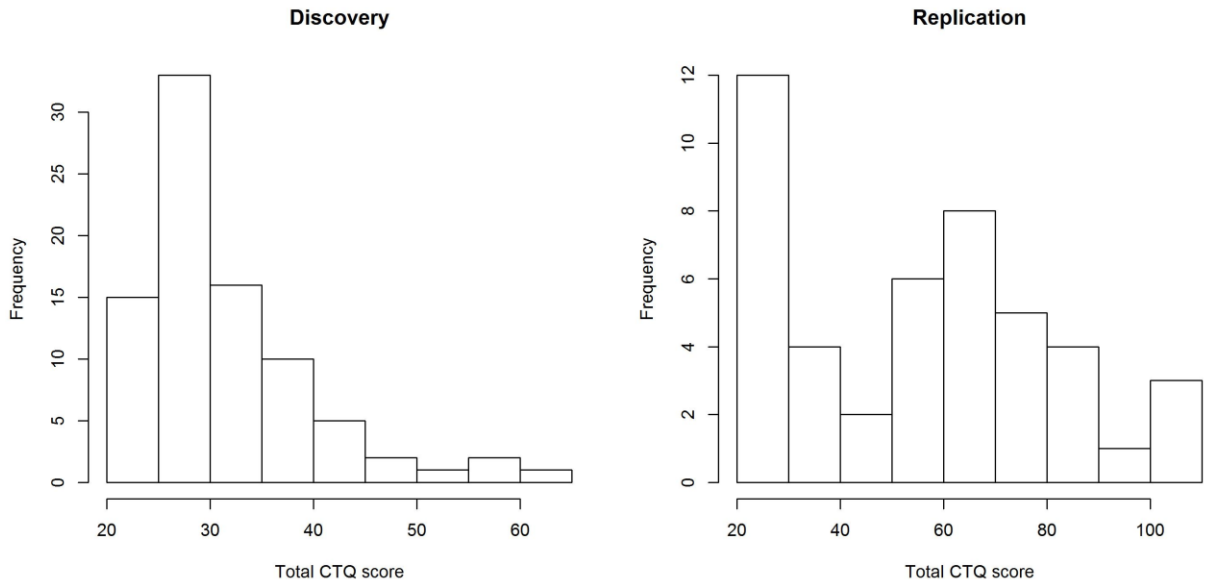

**Figure 6** Distribution of the childhood trauma questionnaire (CTQ) scores in the discovery (N=85) and replication (N=45) samples.

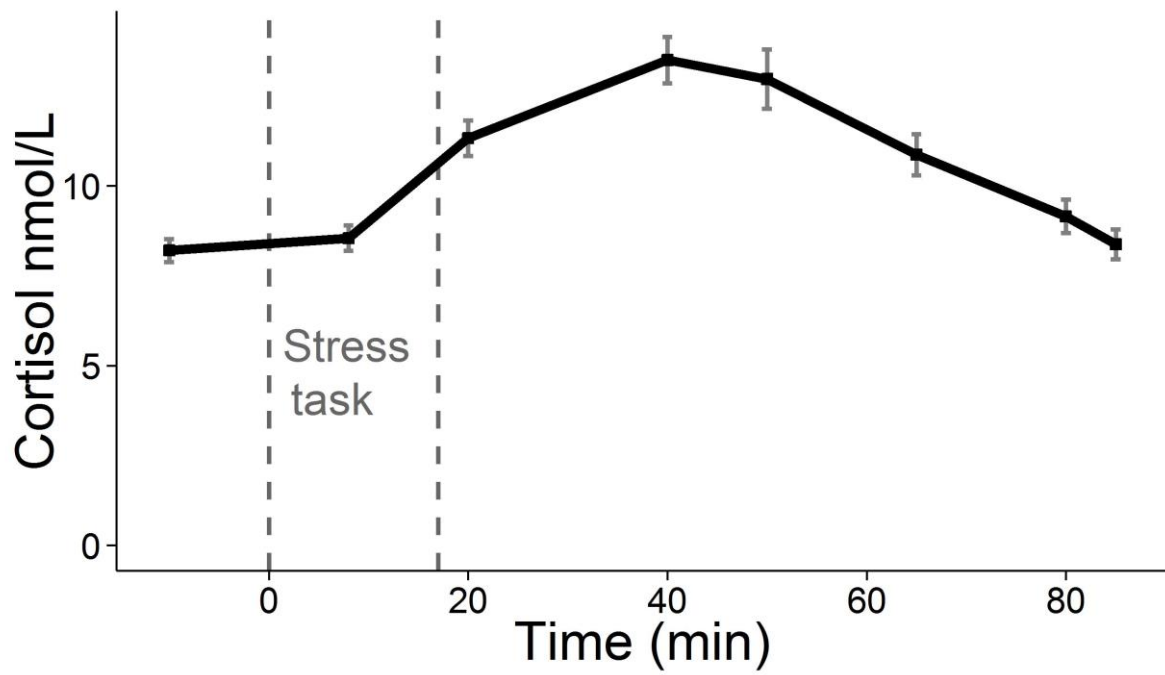

**Figure 7** The cortisol response over time in the discovery sample of 85 healthy controls. The error bars indicate the standard error of measurement (SEM) per time point in these 85 healthy controls. Abbreviations: min= minutes.

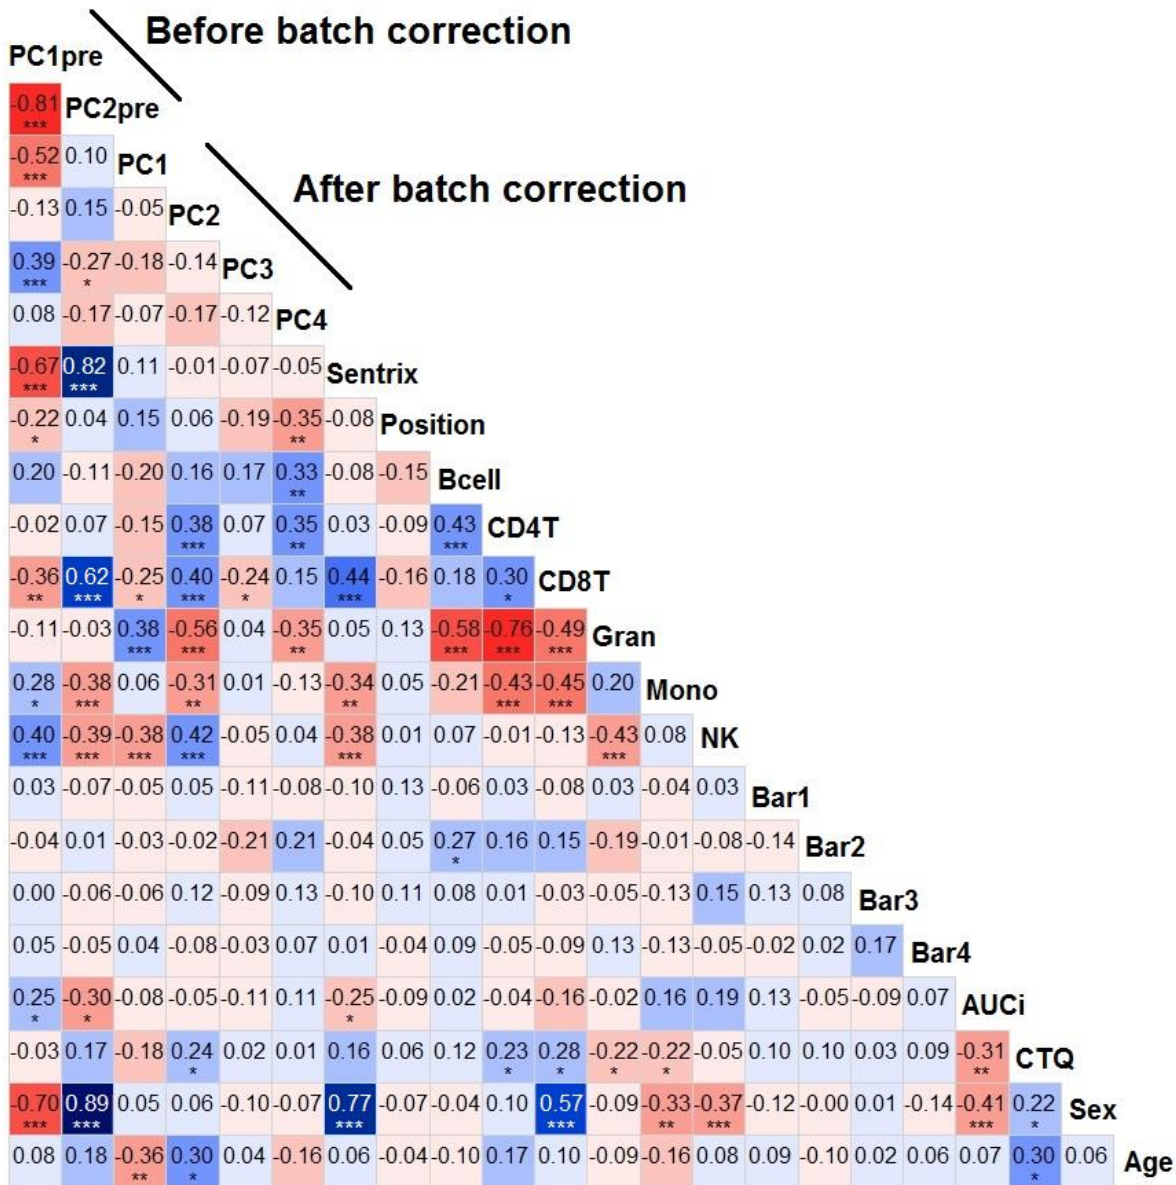

**Figure 8** The correlation between batch effects, potential confounders and general methylation levels (principal components) before and after batch effect removal in the discovery sample (N=85). Positive correlations are blue and negative correlations are red, the color intensity is related to the size of the correlation coefficient. Significant values for these Spearman's correlation are denoted by \* p<0.05, \*\* p<0.001, \*\*\*p<0.0001. Abbreviations: AUCi= cortisol stress response area under the curve(AUC) with respect to the increase,CTQ= Childhood Trauma Questionnaire, CD8T= CD8 T cell proportion, CD4T=CD4 T cell proportion, NK=Natural Killer cell proportion, Mono=Monocytes cell proportion,Gran=Granulocytes cell proportion, Bar= ancestry estimates calculated according to <sup>1</sup>, PC= principal component. The mention of 'pre' after the principal component number (e.g. PC1pre), stands for 'before batch effect removal'.



|              |              |              |             |         |          |              |       |       |     |  |
|--------------|--------------|--------------|-------------|---------|----------|--------------|-------|-------|-----|--|
| PC1          |              |              |             |         |          |              |       |       |     |  |
| 0.41<br>***  | PC2          |              |             |         |          |              |       |       |     |  |
| 0.27<br>***  | 0.04         | PC3          |             |         |          |              |       |       |     |  |
| 0.39<br>***  | 0.00         | -0.02        | PC4         |         |          |              |       |       |     |  |
| 0.02         | -0.07        | -0.06        | 0.15<br>*   | sentrix |          |              |       |       |     |  |
| -0.57<br>*** | -0.10        | -0.38<br>*** | -0.20<br>** | 0.02    | position |              |       |       |     |  |
| 0.02         | 0.11         | -0.28<br>*** | 0.61<br>*** | -0.03   | -0.04    | plate        |       |       |     |  |
| -0.14<br>*   | -0.18<br>**  | 0.02         | -0.11       | 0.02    | 0.02     | -0.03        | AUCi  |       |     |  |
| -0.08        | -0.22<br>*** | 0.09         | -0.12       | 0.05    | 0.01     | -0.10        | 0.08  | sex   |     |  |
| 0.03         | -0.03        | 0.07         | -0.12       | -0.03   | -0.02    | -0.25<br>*** | -0.02 | -0.04 | age |  |

**Figure 9** Correlation between our variables of interest and potential confounders before batch correction in the cross-tissue sample (N=255). Significant values for these Spearman's correlation are denoted by \*  $p < 0.05$ , \*\*  $p < 0.001$ , \*\*\*  $p < 0.0001$ . Abbreviations: Cort\_AUCi= cortisol stress response area under the curve(AUC) with respect to the increase, Col= sentrix column, pc= principal component

|              |            |       |       |         |          |              |       |       |     |
|--------------|------------|-------|-------|---------|----------|--------------|-------|-------|-----|
| PC1          |            |       |       |         |          |              |       |       |     |
| -0.62<br>*** | PC2        |       |       |         |          |              |       |       |     |
| 0.22<br>***  | 0.01       | PC3   |       |         |          |              |       |       |     |
| 0.26<br>***  | -0.01      | 0.09  | PC4   |         |          |              |       |       |     |
| -0.03        | 0.06       | 0.03  | -0.06 | sentrix |          |              |       |       |     |
| -0.17<br>*   | 0.10       | 0.00  | -0.12 | 0.02    | position |              |       |       |     |
| -0.01        | 0.03       | 0.11  | 0.00  | -0.03   | -0.04    | plate        |       |       |     |
| -0.13<br>*   | 0.15<br>*  | -0.10 | 0.02  | 0.02    | 0.02     | -0.03        | AUCi  |       |     |
| -0.13<br>*   | 0.19<br>** | -0.09 | -0.11 | 0.05    | 0.01     | -0.10        | 0.08  | sex   |     |
| 0.07         | -0.02      | -0.01 | 0.10  | -0.03   | -0.02    | -0.25<br>*** | -0.02 | -0.04 | age |

**Figure 10** Correlation between our variables of interest and potential confounders after batch correction for sentrix and position in the cross-tissue sample (N=255). Significant values for these Spearman’s correlation are denoted by \* p<0.05, \*\* p<0.001, \*\*\*p<0.0001. Abbreviations: AUCi= cortisol stress response area under the curve(AUC) with respect to the increase, Col= sentrix column, pc= principal component

Supplementary information

**Table 1** Overview of studies investigating childhood trauma and cortisol stress reactivity.

| Reference                                    | Population (N)                          | Ethnicity                                                | Stress task                                        | Childhood trauma assessment         | Relation childhood trauma and cortisol               |
|----------------------------------------------|-----------------------------------------|----------------------------------------------------------|----------------------------------------------------|-------------------------------------|------------------------------------------------------|
| (Carpenter et al. 2007) <sup>2</sup>         | HC (N=50)                               | Cauc (76%);<br>Black (6%);<br>Asian (8%);<br>Other (10%) | TSST                                               | CTQ                                 | ↓                                                    |
| (Carpenter et al. 2011) <sup>3</sup>         | HC (N=78)                               | Unknown                                                  | TSST                                               | CTQ                                 | ↓                                                    |
| (Elzinga et al. 2008) <sup>4</sup>           | HC (N=80)                               | Unknown                                                  | TSST                                               | TEC                                 | ↓                                                    |
| (Heim et al. 2000) <sup>5</sup>              | HC (N=26) vs MDD (N=23)                 | Afr-Am(27%);<br>Cauc (73%)                               | TSST                                               | ETI                                 | Ns in HC,<br>↑ in MDD                                |
| (Moran-Santa Maria et al. 2010) <sup>6</sup> | HC (N=43) and Cocaine dependence (N=42) | Unknown                                                  | TSST                                               | ETI-SR                              | Ns in HC,<br>Ns in cocaine dependent                 |
| (Pesonen et al. 2010) <sup>7</sup>           | HC vs WWII separation(N=282)            | Unknown                                                  | TSST                                               | WWII separation                     | ↑ separated both parents                             |
| (Witt et al. 2011) <sup>8</sup>              | HC (N=228)                              | Cauc (99%)                                               | TSST                                               | Enriched family adversity index     | N/A focus NPY genotype:<br>↓ TT allele               |
| (Buchmann et al. 2014) <sup>9</sup>          | HC (N=195)                              | Unknown                                                  | TSST                                               | CTQ                                 | N/A focus FKBP5 genotype:<br>↓ C allele, ns T allele |
| (Kraft and Luecken, 2009) <sup>10</sup>      | HC (N=94)                               | Cauc(78%);<br>Afr-Am(2%);<br>His(14%);<br>Oth(6%)        | Speech                                             | Parental divorce                    | ↓                                                    |
| (Luecken, 1998) <sup>11</sup>                | HC (N=61)                               | Cauc(66%);<br>Black(25%);<br>Asian(7%);<br>Other(3%)     | Speech/ video                                      | Parental loss                       | ↑                                                    |
| (Otte et al. 2005) <sup>12</sup>             | HC (N=76)                               | Unknown                                                  | Video                                              | LSCR interview; age <14 yrs         | Ns                                                   |
| (Goldman-Mellor et al. 2012) <sup>13</sup>   | HC (N=543)                              | Unknown                                                  | Two 5-min tasks:<br>Stroop test/<br>Mirror tracing | ELS questions in longitudinal study | ↑ELS no distress<br>↓ELS distress                    |
| (Elzinga et al. 2010) <sup>14</sup>          | Social Anxiety Disorder(N=50)           | Unknown                                                  | TSST                                               | TEC                                 | ↑SAD patient                                         |
| (Vidlock et al. 2009) <sup>15</sup>          | Early life stress mixed sample          | Unknown                                                  | Sigmoidoscopy                                      | Trauma history                      | Ns                                                   |

Supplementary information

|                                       |                                                 |                                         |                            |                                                |    |
|---------------------------------------|-------------------------------------------------|-----------------------------------------|----------------------------|------------------------------------------------|----|
|                                       | (HC& IBS N=83)                                  |                                         |                            | questionnaire                                  |    |
| (Bremner et al. 2003) <sup>16</sup>   | HC vs PTSD (N=41)                               | Unknown                                 | 20 min Cognitive challenge | ETI                                            | Ns |
| (Santa Ana et al. 2006) <sup>17</sup> | HC vs PTSD (adult/ childhood index trauma N=89) | Cauc(73%);<br>Afr-Am(25%);<br>Other(2%) | CPT(= Cold pressure test)  | CAPS determine index trauma childhood vs adult | Ns |

Abbreviations: Cauc=Caucasian, Afr-Am=Afro-American, CTQ= childhood trauma questionnaire, ELS=early life stress, DHS= Daily hassles scale; LES= Life experiences survey; LSCR= Life stressor checklist revised, SAD= social anxiety disorder, MDD= major depressive disorder, HC= healthy control, PTSD= post traumatic stress disorder, IBS= Irritable Bowel Syndrome, TSST= Trier social stress test, ETI= Early trauma inventory; CPT= Cold pressure test; WWII= second world war; Ns= non significant; N/A= not applicable.

Supplementary information

**Table 2** Characteristics of the top three DNA methylation loci from the genome-wide cortisol stress reactivity methylation analysis.

| Cg number                                                  | 27512205                                   | 05608730                                   | 261779948                                 |
|------------------------------------------------------------|--------------------------------------------|--------------------------------------------|-------------------------------------------|
| Gene                                                       | <i>KITLG</i>                               | <i>CIQTNF2</i>                             | <i>JAZF1</i>                              |
| Location                                                   | Chr 12: 88579621<br>North-shore CpG island | Chr 5: 159797775<br>South-shore CpG island | Chr 7: 28181035<br>South-shore CpG island |
| Discovery (N=85) mean methylation <sup>#</sup> [range]     | 0.15 [0.12 - 0.19]                         | 0.38 [0.29 - 0.47]                         | 0.12 [0.09 - 0.16]                        |
| Replication (N=45) mean methylation <sup>#</sup> [range]   | 0.14 [0.11-0.18]                           | 0.37 [0.31-0.46]                           | 0.10 [0.08-0.14]                          |
| Cross-tissue (N=255) mean methylation <sup>#</sup> [range] | 0.09 [0.07-0.12]                           | 0.08 [0.05-0.11]                           | 0.23 [0.16-0.31]                          |
| Discovery association cortisol AUCi                        | B= -1161, p=5.8x10 <sup>-6</sup> *         | B= -935, p=6.0x10 <sup>-6</sup> *          | B= -1009, p=8.0x10 <sup>-6</sup> *        |
| Blood replication association Cortisol AUCi                | B=-1040, p=0.006*                          | B=433, p= 0.15                             | B=223, p=0.48                             |
| Cross-tissue association cortisol AUCi                     | B=-104 , p=0.003*                          | B=38, p=0.13                               | B=-2, p=0.95                              |
| Discovery association CTQ                                  | B=0.005, p=0.04*                           | B=0.006, p=0.04*                           | B=0.006, p=0.02*                          |
| Blood replication association CTQ                          | B=0.001, p=0.146                           | B=-0.0001, p=0.903                         | B=-1.4 x10 <sup>-5</sup> , p=0.990        |

\* denotes a nominal association (p<0.05) in a linear regression model

# Methylation in percentage (betas)

Abbreviations: AUCi= Area under the curve(AUC) with respect to the increase; CTQ=Childhood trauma questionnaire; *KITLG*=kit ligand; *CIQTNF2*= C1q and tumor necrosis factor related protein 2; *JAZF1*= Juxtaposed with another zinc finger protein 1

Supplementary information

**Table 3** The webgestalt output for the enrichment analysis of microRNA-related genes in the 19 gene network around *KITLG* (EntrezGene id 4254). We used a hypergeometric test with all Entrez genes as background and a significance level of 0.05 (FDR correction). The results for each enriched gene sets are listed in this table. For each gene set, the first row lists database name, gene set name, and corresponding gene set ID. The second row lists the following statistics: C: the number of reference genes in the category; O: the number of genes in the gene set and also in the category; E: the expected number in the category; R: ratio of enrichment; rawP: p value from hypergeometric test; adjP: p-value adjusted by the multiple test adjustment.

| <b>Database:microRNA Target Name:hsa_CACTGCC,MIR-34A,MIR-34C,MIR-449 ID:DB_ID:673</b> |                |                    |                                                  |                        |                                 |
|---------------------------------------------------------------------------------------|----------------|--------------------|--------------------------------------------------|------------------------|---------------------------------|
| C=277; O=3; E=0.14; R=21.23; rawP=0.0004; adjP=0.0012                                 |                |                    |                                                  |                        |                                 |
| <u>Index</u>                                                                          | <u>UserID</u>  | <u>Gene Symbol</u> | <u>Gene Name</u>                                 | <u>EntrezGene</u>      | <u>Ensembl</u>                  |
| 1                                                                                     | <i>KITLG</i>   | <i>KITLG</i>       | KIT ligand                                       | <a href="#">4254</a>   | <a href="#">ENSG00000049130</a> |
| 2                                                                                     | <i>SHKBP1</i>  | <i>SHKBP1</i>      | SH3KBP1 binding protein 1                        | <a href="#">92799</a>  | <a href="#">ENSG00000160410</a> |
| 3                                                                                     | <i>COL12A1</i> | <i>COL12A1</i>     | collagen, type XII, alpha 1                      | <a href="#">1303</a>   | <a href="#">ENSG00000111799</a> |
| <b>Database:microRNA Target Name:hsa_AATGTGA,MIR-23A,MIR-23B ID:DB_ID:683</b>         |                |                    |                                                  |                        |                                 |
| C=417; O=3; E=0.21; R=14.10; rawP=0.0012; adjP=0.0018                                 |                |                    |                                                  |                        |                                 |
| <u>Index</u>                                                                          | <u>UserID</u>  | <u>Gene Symbol</u> | <u>Gene Name</u>                                 | <u>EntrezGene</u>      | <u>Ensembl</u>                  |
| 1                                                                                     | <i>KITLG</i>   | <i>KITLG</i>       | KIT ligand                                       | <a href="#">4254</a>   | <a href="#">ENSG00000049130</a> |
| 2                                                                                     | <i>EYAI</i>    | <i>EYAI</i>        | eyes absent homolog 1 (Drosophila)               | <a href="#">2138</a>   | <a href="#">ENSG00000104313</a> |
| 3                                                                                     | <i>HMG2</i>    | <i>HMG2</i>        | high mobility group nucleosomal binding domain 2 | <a href="#">3151</a>   | <a href="#">ENSG00000198830</a> |
| <b>Database:microRNA Target Name:hsa_ACCAAAG,MIR-9 ID:DB_ID:809</b>                   |                |                    |                                                  |                        |                                 |
| C=493; O=3; E=0.25; R=11.93; rawP=0.0019; adjP=0.0019                                 |                |                    |                                                  |                        |                                 |
| <u>Index</u>                                                                          | <u>UserID</u>  | <u>Gene Symbol</u> | <u>Gene Name</u>                                 | <u>EntrezGene</u>      | <u>Ensembl</u>                  |
| 1                                                                                     | <i>KITLG</i>   | <i>KITLG</i>       | KIT ligand                                       | <a href="#">4254</a>   | <a href="#">ENSG00000049130</a> |
| 2                                                                                     | <i>CCDC43</i>  | <i>CCDC43</i>      | coiled-coil domain containing 43                 | <a href="#">124808</a> | <a href="#">ENSG00000180329</a> |
| 3                                                                                     | <i>COL12A1</i> | <i>COL12A1</i>     | collagen, type XII, alpha 1                      | <a href="#">1303</a>   | <a href="#">ENSG00000111799</a> |

**Table 4** Enrichment for micro RNA 449 (miR449) related genes for all the methylation clusters (denoted by color).

| <b>Methylation cluster</b> | <b>Number of miR449 related genes</b> | <b>Number of not miR449 related genes</b> | <b>Percentage of miR449 genes present</b> | <b>Odds Ratio</b> | <b>Fisher p value</b> | <b>FDR corrected p value</b> |
|----------------------------|---------------------------------------|-------------------------------------------|-------------------------------------------|-------------------|-----------------------|------------------------------|
| All                        | 268                                   | 19547                                     | 100                                       |                   |                       |                              |
| black                      | 109                                   | 6370                                      | 1.682358                                  | 1.245691          | 0.061912              | 0.130342                     |
| blue                       | 191                                   | 11991                                     | 1.567887                                  | 1.153744          | 0.134                 | 0.243636                     |
| brown                      | 186                                   | 11605                                     | 1.577474                                  | 1.153496          | 0.143219              | 0.249077                     |
| cyan                       | 82                                    | 3891                                      | 2.063932                                  | 1.536893          | <b>0.001115*</b>      | <b>0.008338*</b>             |
| darkgreen                  | 20                                    | 703                                       | 2.766252                                  | 2.074587          | <b>0.005235*</b>      | <b>0.021351*</b>             |
| darkgrey                   | 15                                    | 820                                       | 1.796407                                  | 1.333978          | 0.284564              | 0.392502                     |
| darkmagenta                | 6                                     | 360                                       | 1.639344                                  | 1.215595          | 0.643431              | 0.756978                     |
| darkolivegreen             | 4                                     | 319                                       | 1.23839                                   | 0.914569          | 1                     | 1                            |
| darkorange                 | 4                                     | 462                                       | 0.858369                                  | 0.631463          | 0.537006              | 0.683596                     |
| darkred                    | 21                                    | 995                                       | 2.066929                                  | 1.539304          | 0.071587              | 0.143174                     |
| darkturquoise              | 19                                    | 749                                       | 2.473958                                  | 1.850108          | <b>0.016935*</b>      | 0.060097                     |
| green                      | 197                                   | 10399                                     | 1.859192                                  | 1.38066           | <b>0.000835*</b>      | <b>0.008338*</b>             |
| greenyellow                | 95                                    | 4636                                      | 2.008032                                  | 1.493732          | <b>0.001251*</b>      | <b>0.008338*</b>             |
| grey                       | 198                                   | 11512                                     | 1.690863                                  | 1.251039          | <b>0.018029*</b>      | 0.060097                     |
| grey60                     | 73                                    | 4013                                      | 1.786588                                  | 1.326762          | <b>0.035661*</b>      | 0.089153                     |
| lightcyan                  | 62                                    | 2984                                      | 2.035456                                  | 1.515091          | <b>0.005338*</b>      | <b>0.021351*</b>             |
| lightgreen                 | 22                                    | 958                                       | 2.244898                                  | 1.674892          | <b>0.025257*</b>      | 0.07355                      |
| lightyellow                | 14                                    | 1006                                      | 1.372549                                  | 1.014867          | 0.889579              | 0.961707                     |
| magenta                    | 72                                    | 4019                                      | 1.759961                                  | 1.306167          | 0.050033              | 0.117724                     |
| midnightblue               | 81                                    | 4393                                      | 1.81046                                   | 1.344817          | <b>0.025743*</b>      | 0.07355                      |
| orange                     | 6                                     | 436                                       | 1.357466                                  | 1.003714          | 1                     | 1                            |
| orangered4                 | 1                                     | 57                                        | 1.724138                                  | 1.279568          | 0.546877              | 0.683596                     |
| paleturquoise              | 4                                     | 356                                       | 1.111111                                  | 0.819519          | 1                     | 1                            |
| pink                       | 87                                    | 5337                                      | 1.603982                                  | 1.187151          | 0.171955              | 0.286591                     |
| plum1                      | 3                                     | 105                                       | 2.777778                                  | 2.083792          | 0.182146              | 0.291433                     |
| purple                     | 139                                   | 6852                                      | 1.988271                                  | 1.479495          | <b>0.000265*</b>      | <b>0.006305*</b>             |
| red                        | 175                                   | 9319                                      | 1.843269                                  | 1.369061          | <b>0.001504*</b>      | <b>0.008593*</b>             |
| royalblue                  | 26                                    | 977                                       | 2.592223                                  | 1.94093           | <b>0.003444*</b>      | <b>0.017219*</b>             |
| saddlebrown                | 7                                     | 620                                       | 1.116427                                  | 0.823483          | 0.859114              | 0.954572                     |
| salmon                     | 90                                    | 4195                                      | 2.10035                                   | 1.563072          | <b>0.000473*</b>      | <b>0.006305*</b>             |
| sienna3                    | 4                                     | 250                                       | 1.574803                                  | 1.166974          | 0.780178              | 0.891632                     |
| skyblue                    | 10                                    | 638                                       | 1.54321                                   | 1.143197          | 0.605118              | 0.733477                     |
| skyblue3                   | 3                                     | 112                                       | 2.608696                                  | 1.953568          | 0.206203              | 0.305485                     |
| steelblue                  | 9                                     | 332                                       | 2.639296                                  | 1.977104          | 0.055395              | 0.123101                     |
| tan                        | 103                                   | 5792                                      | 1.747243                                  | 1.296961          | <b>0.0293*</b>        | 0.078133                     |
| turquoise                  | 180                                   | 12050                                     | 1.471791                                  | 1.078191          | 0.434365              | 0.579153                     |
| violet                     | 1                                     | 294                                       | 0.338983                                  | 0.24807           | 0.194646              | 0.299456                     |
| white                      | 15                                    | 697                                       | 2.106742                                  | 1.569591          | 0.099306              | 0.189154                     |
| yellow                     | 219                                   | 11446                                     | 1.877411                                  | 1.394889          | <b>0.000321*</b>      | <b>0.006305*</b>             |
| yellowgreen                | 5                                     | 234                                       | 2.09205                                   | 1.558406          | 0.264274              | 0.377535                     |

\*p&lt;0.05 in a Fisher's exact test

**Table 5** Enrichment for micro RNA 23A/23B (miR23A/miR23B) related genes for all the methylation clusters (denoted by color).

| Methylation cluster | Number of miR23A/miR23B related genes | Number of not miR23A/miR23B related genes | Percentage of miR23A/miR23B genes present | Odds Ratio | Fisher p value   | FDR corrected p value |
|---------------------|---------------------------------------|-------------------------------------------|-------------------------------------------|------------|------------------|-----------------------|
| All                 | 388                                   | 18888                                     | 100                                       |            |                  |                       |
| Black               | 125                                   | 6354                                      | 1.92931                                   | 0.980542   | 0.876933         | 0.97437               |
| Blue                | 275                                   | 11907                                     | 2.257429                                  | 1.145333   | 0.090175         | 0.150291              |
| Brown               | 309                                   | 11482                                     | 2.620643                                  | 1.336477   | <b>0.000194*</b> | <b>0.000864*</b>      |
| Cyan                | 110                                   | 3863                                      | 2.768689                                  | 1.421835   | <b>0.001925*</b> | <b>0.005922*</b>      |
| Darkgreen           | 34                                    | 689                                       | 4.702628                                  | 2.463708   | <b>1.11E-05*</b> | <b>0.000111*</b>      |
| Darkgrey            | 27                                    | 808                                       | 3.233533                                  | 1.668413   | <b>0.016055*</b> | <b>0.033799*</b>      |
| darkmagenta         | 6                                     | 360                                       | 1.639344                                  | 0.832311   | 0.848498         | 0.97437               |
| darkolivegreen      | 4                                     | 319                                       | 1.23839                                   | 0.626196   | 0.538432         | 0.694751              |
| darkorange          | 13                                    | 453                                       | 2.7897                                    | 1.432982   | 0.234532         | 0.347454              |
| Darkred             | 30                                    | 986                                       | 2.952756                                  | 1.519366   | <b>0.037978*</b> | 0.066048              |
| darkturquoise       | 36                                    | 732                                       | 4.6875                                    | 2.45566    | <b>5.94E-06*</b> | <b>9.78E-05*</b>      |
| Green               | 268                                   | 10328                                     | 2.529256                                  | 1.294863   | <b>0.001427*</b> | <b>0.004756*</b>      |
| greenyellow         | 124                                   | 4607                                      | 2.62101                                   | 1.343338   | <b>0.005541*</b> | <b>0.014776*</b>      |
| Grey                | 273                                   | 11437                                     | 2.331341                                  | 1.188753   | <b>0.031269*</b> | 0.05956               |
| grey60              | 104                                   | 3982                                      | 2.545277                                  | 1.304249   | <b>0.021412*</b> | <b>0.042825*</b>      |
| lightcyan           | 117                                   | 2929                                      | 3.841103                                  | 1.994367   | <b>1.21E-09*</b> | <b>4.85E-08*</b>      |
| lightgreen          | 31                                    | 949                                       | 3.163265                                  | 1.631224   | <b>0.013915*</b> | <b>0.030923*</b>      |
| lightyellow         | 19                                    | 1001                                      | 1.862745                                  | 0.947735   | 0.908            | 0.981622              |
| magenta             | 121                                   | 3970                                      | 2.957712                                  | 1.521468   | <b>0.000135*</b> | <b>0.000755*</b>      |
| midnightblue        | 130                                   | 4344                                      | 2.905677                                  | 1.494441   | <b>0.000151*</b> | <b>0.000755*</b>      |
| orange              | 9                                     | 433                                       | 2.036199                                  | 1.037991   | 0.86174          | 0.97437               |
| orangered4          | 3                                     | 55                                        | 5.172414                                  | 2.723566   | 0.106554         | 0.170487              |
| paleturquoise       | 8                                     | 352                                       | 2.222222                                  | 1.134953   | 0.699199         | 0.847514              |
| pink                | 122                                   | 5302                                      | 2.249263                                  | 1.147337   | 0.191923         | 0.295265              |
| plum1               | 2                                     | 106                                       | 1.851852                                  | 0.942235   | 1                | 1                     |
| purple              | 189                                   | 6802                                      | 2.703476                                  | 1.387493   | <b>0.000384*</b> | <b>0.001534*</b>      |
| red                 | 267                                   | 9227                                      | 2.812303                                  | 1.4444     | <b>7.33E-06*</b> | <b>9.78E-05*</b>      |
| royalblue           | 36                                    | 967                                       | 3.589232                                  | 1.859137   | <b>0.001183*</b> | <b>0.004301*</b>      |
| saddlebrown         | 15                                    | 612                                       | 2.392344                                  | 1.223963   | 0.463515         | 0.61802               |
| salmon              | 106                                   | 4179                                      | 2.473746                                  | 1.265298   | <b>0.037522*</b> | 0.066048              |
| sienna3             | 5                                     | 249                                       | 1.968504                                  | 1.002777   | 1                | 1                     |
| skyblue             | 10                                    | 638                                       | 1.54321                                   | 0.782737   | 0.562594         | 0.703242              |
| skyblue3            | 4                                     | 111                                       | 3.478261                                  | 1.799455   | 0.292754         | 0.41822               |
| steelblue           | 14                                    | 327                                       | 4.105572                                  | 2.137922   | <b>0.010054*</b> | <b>0.025134*</b>      |
| tan                 | 170                                   | 5725                                      | 2.8838                                    | 1.482782   | <b>3.63E-05*</b> | <b>0.000242*</b>      |
| turquoise           | 241                                   | 11989                                     | 1.970564                                  | 0.99597    | 1                | 1                     |
| violet              | 8                                     | 287                                       | 2.711864                                  | 1.391961   | 0.392259         | 0.541046              |
| white               | 24                                    | 688                                       | 3.370787                                  | 1.74197    | <b>0.013647*</b> | <b>0.030923*</b>      |
| yellow              | 315                                   | 11350                                     | 2.700386                                  | 1.385325   | <b>2.77E-05*</b> | <b>0.000222*</b>      |
| yellowgreen         | 12                                    | 227                                       | 5.020921                                  | 2.639601   | <b>0.003268*</b> | <b>0.009338*</b>      |

\*p&lt;0.05 in a Fisher's exact test



**Table 6** Enrichment for micro RNA 9 (miR9) related genes for all the methylation clusters (denoted by color).

| Methylation cluster | Number of miR9 related genes | Number of not miR9 related genes | Percentage of miR9 genes present | Odds Ratio | Fisher p value   | FDR corrected p value |
|---------------------|------------------------------|----------------------------------|----------------------------------|------------|------------------|-----------------------|
| All                 | 471                          | 18805                            | 100                              |            |                  |                       |
| Black               | 168                          | 6311                             | 2.592993                         | 1.091209   | 0.352824         | 0.431453              |
| Blue                | 346                          | 11836                            | 2.840256                         | 1.1922     | <b>0.014562*</b> | <b>0.03077*</b>       |
| Brown               | 356                          | 11435                            | 3.019252                         | 1.266976   | <b>0.001035*</b> | <b>0.003764*</b>      |
| Cyan                | 129                          | 3844                             | 3.246917                         | 1.378097   | <b>0.001885*</b> | <b>0.0058*</b>        |
| darkgreen           | 23                           | 700                              | 3.181189                         | 1.349202   | 0.172396         | 0.246279              |
| darkgrey            | 32                           | 803                              | 3.832335                         | 1.636352   | <b>0.011275*</b> | <b>0.028189*</b>      |
| darkmagenta         | 16                           | 350                              | 4.371585                         | 1.877447   | <b>0.023084*</b> | <b>0.046167*</b>      |
| darkolivegreen      | 12                           | 311                              | 3.71517                          | 1.584633   | 0.137311         | 0.211248              |
| darkorange          | 15                           | 451                              | 3.218884                         | 1.365857   | 0.220659         | 0.304357              |
| Darkred             | 35                           | 981                              | 3.444882                         | 1.465245   | <b>0.036233*</b> | 0.065878              |
| darkturquoise       | 28                           | 740                              | 3.645833                         | 1.553862   | <b>0.030762*</b> | 0.058594              |
| Green               | 341                          | 10255                            | 3.218196                         | 1.364611   | <b>2.03E-05*</b> | <b>0.000247*</b>      |
| greenyellow         | 148                          | 4583                             | 3.128303                         | 1.325515   | <b>0.003827*</b> | <b>0.010935*</b>      |
| Grey                | 348                          | 11362                            | 2.971819                         | 1.254436   | <b>0.001833*</b> | <b>0.0058*</b>        |
| grey60              | 135                          | 3951                             | 3.303965                         | 1.403281   | <b>0.000844*</b> | <b>0.003375*</b>      |
| lightcyan           | 120                          | 2926                             | 3.939593                         | 1.683951   | <b>2.02E-06*</b> | <b>8.1E-05*</b>       |
| lightgreen          | 38                           | 942                              | 3.877551                         | 1.656696   | <b>0.00554*</b>  | <b>0.014773*</b>      |
| lightyellow         | 21                           | 999                              | 2.058824                         | 0.863202   | 0.596849         | 0.663166              |
| magenta             | 125                          | 3966                             | 3.055488                         | 1.293958   | <b>0.013142*</b> | <b>0.03077*</b>       |
| midnightblue        | 135                          | 4339                             | 3.017434                         | 1.277805   | <b>0.014616*</b> | <b>0.03077*</b>       |
| orange              | 14                           | 428                              | 3.167421                         | 1.343389   | 0.269089         | 0.358785              |
| orangered4          | 1                            | 57                               | 1.724138                         | 0.720537   | 1                | 1                     |
| paleturquoise       | 11                           | 349                              | 3.055556                         | 1.294451   | 0.381217         | 0.448491              |
| pink                | 153                          | 5271                             | 2.820796                         | 1.192889   | <b>0.067614*</b> | 0.11269               |
| plum1               | 2                            | 106                              | 1.851852                         | 0.774915   | 1                | 1                     |
| purple              | 223                          | 6768                             | 3.189815                         | 1.353138   | <b>0.000322*</b> | <b>0.001609*</b>      |
| red                 | 301                          | 9193                             | 3.170423                         | 1.344136   | <b>9.54E-05*</b> | <b>0.000636*</b>      |
| royalblue           | 34                           | 969                              | 3.389831                         | 1.44101    | <b>0.045612*</b> | <b>0.079326*</b>      |
| saddlebrown         | 14                           | 613                              | 2.232855                         | 0.937981   | 1                | 1                     |
| salmon              | 152                          | 4133                             | 3.547258                         | 1.508769   | <b>2.62E-05*</b> | <b>0.000247*</b>      |
| sienna3             | 3                            | 251                              | 1.181102                         | 0.490888   | 0.295266         | 0.380989              |
| skyblue             | 21                           | 627                              | 3.240741                         | 1.375513   | 0.151841         | 0.224949              |
| skyblue3            | 4                            | 111                              | 3.478261                         | 1.479937   | 0.355948         | 0.431453              |
| steelblue           | 9                            | 332                              | 2.639296                         | 1.113338   | 0.718295         | 0.776535              |
| tan                 | 194                          | 5701                             | 3.290925                         | 1.397485   | <b>0.00015*</b>  | <b>0.000859*</b>      |
| turquoise           | 313                          | 11917                            | 2.55928                          | 1.067382   | 0.39254          | 0.448617              |
| violet              | 12                           | 283                              | 4.067797                         | 1.741421   | 0.079458         | 0.127133              |
| white               | 37                           | 675                              | 5.196629                         | 2.25118    | <b>2.19E-05*</b> | <b>0.000247*</b>      |
| yellow              | 370                          | 11295                            | 3.171882                         | 1.344763   | <b>3.08E-05*</b> | <b>0.000247*</b>      |
| yellowgreen         | 15                           | 224                              | 6.276151                         | 2.749983   | <b>0.000769*</b> | <b>0.003375*</b>      |

\*p&lt;0.05 in a Fisher's exact test

**Supplementary Note 1: Possible confounders in the blood replication sample**

First the potential confounding by cellcount on average DNA methylation was examined (analysis 1 on p18).

Next we investigated the potential influence of current MDD and ethnicity per outcome variable (cg27512205 methylation levels, cortisol stress reactivity and childhood trauma)(analyses 2-7 on p19-20). Moreover stratified analyses for current MDD and ethnicity were performed to investigate potential confounding (analyses 8-19 on p21-25).

Finally, to establish the influence of current MDD and ethnicity, they were added as covariates to the model examining the association between *KITLG* and cortisol stress reactivity (analysis 20 on p26).

**First the potential confounding by cellcount on average DNA methylation in the blood replication sample is examined.**

**Aim analysis 1:** Association between cellcount and average DNA methylation in the blood replication sample is examined.

**Linear regression model 1:** Average methylation ~ CD8 T cells + CD4 T cells + Natural Killer cells + Bcells + Monocytes + Granulocytes

| <b>Result 1 Average methylation ~Cellcount</b>                            |                 |                   |                |                     |
|---------------------------------------------------------------------------|-----------------|-------------------|----------------|---------------------|
|                                                                           | <i>Estimate</i> | <i>Std. Error</i> | <i>t value</i> | <i>Pr(&gt; t )</i>  |
| M\$CD8                                                                    | -4.629          | 1.126             | -4.111         | 0.0000465713987 *** |
| M\$CD4T                                                                   | -4.306          | 1.146             | -3.757         | 0.000194 ***        |
| M\$NK                                                                     | -4.330          | 1.142             | -3.792         | 0.000169 ***        |
| M\$Bcell                                                                  | -3.804          | 1.047             | -3.634         | 0.000310 ***        |
| M\$Mon                                                                    | -3.731          | 1.233             | -3.026         | 0.002618 **         |
| M\$Gran                                                                   | -4.359          | 1.127             | -3.867         | 0.000126 ***        |
| ---                                                                       |                 |                   |                |                     |
| Signif. codes: 0 '***' 0.001 '**' 0.01 '*' 0.05 '.' 0.1 ' ' 1             |                 |                   |                |                     |
| R-squared: 0.02882, F-statistic: 3.335 on 6 and 466 DF, p-value: 0.003164 |                 |                   |                |                     |

**Conclusion 1:** Different cellcounts are associated with average DNA methylation levels in the blood replication sample.

**Next we investigated the association of ethnicity with our main variables (cg27512205 methylation levels, cortisol stress reactivity and childhood trauma) in the blood replication sample.**

**Aim analysis 2:** Influence ethnicity on cg27512205 methylation levels in the blood replication sample.

**Linear regression model 2:** cg27512205 methylation ~ Race

| <b>Result 2 cg27512205 ~ Race</b>                                        |                 |                   |                |                    |
|--------------------------------------------------------------------------|-----------------|-------------------|----------------|--------------------|
|                                                                          | <i>Estimate</i> | <i>Std. Error</i> | <i>t value</i> | <i>Pr(&gt; t )</i> |
| RaceCaucasian                                                            | 0.003545        | 0.052041          | 0.068          | 0.946              |
| RaceOther                                                                | -0.065441       | 0.080285          | -0.815         | 0.420              |
| ---                                                                      |                 |                   |                |                    |
| Signif. codes: 0 '***' 0.001 '**' 0.01 '*' 0.05 '.' 0.1 ' ' 1            |                 |                   |                |                    |
| R-squared: -0.02907, F-statistic: 0.3785 on 2 and 42 DF, p-value: 0.6872 |                 |                   |                |                    |

**Conclusion 2:** Ethnicity is not significantly associated with cg27512205 methylation.

**Aim analysis 3:** Influence ethnicity on cortisol stress reactivity in the blood replication sample.

**Linear regression model 3:** Cortisol stress reactivity (AUCi) ~ Race

| <b>Result 3 AUCi ~ Race</b>                                           |                 |                   |                |                    |
|-----------------------------------------------------------------------|-----------------|-------------------|----------------|--------------------|
|                                                                       | <i>Estimate</i> | <i>Std. Error</i> | <i>t value</i> | <i>Pr(&gt; t )</i> |
| RaceCaucasian                                                         | 331.61          | 116.31            | 2.851          | 0.00673 **         |
| RaceOther                                                             | 538.70          | 179.43            | 3.002          | 0.00450 **         |
| ---                                                                   |                 |                   |                |                    |
| Signif. codes: 0 '***' 0.001 '**' 0.01 '*' 0.05 '.' 0.1 ' ' 1         |                 |                   |                |                    |
| R-squared: 0.2064 F-statistic: 6.723 on 2 and 42 DF, p-value: 0.00293 |                 |                   |                |                    |

**Conclusion 3:** Ethnicity is associated with cortisol stress reactivity, specifically lower cortisol stress reactivity levels in Afro-American compared to Caucasian individuals.

**Aim analysis 4:** Influence ethnicity on childhood trauma levels in the blood replication sample.

**Linear regression model 4:** Childhood trauma (CTQ) ~ Race

| <b>Result 4 CTQ ~ Race</b>                                               |                 |                   |                |                    |
|--------------------------------------------------------------------------|-----------------|-------------------|----------------|--------------------|
|                                                                          | <i>Estimate</i> | <i>Std. Error</i> | <i>t value</i> | <i>Pr(&gt; t )</i> |
| RaceCaucasian                                                            | -1.847          | 8.298             | -0.223         | 0.825              |
| RaceOther                                                                | -7.635          | 12.802            | -0.596         | 0.554              |
| ---                                                                      |                 |                   |                |                    |
| Signif. codes: 0 '***' 0.001 '**' 0.01 '*' 0.05 '.' 0.1 ' ' 1            |                 |                   |                |                    |
| R-squared: -0.03873, F-statistic: 0.1797 on 2 and 42 DF, p-value: 0.8362 |                 |                   |                |                    |

**Conclusion 4:** Ethnicity is not significantly associated with different childhood trauma levels.

**We also examined the association of current MDD with our main variables (cg27512205 methylation levels, cortisol stress reactivity and childhood trauma) in the blood replication sample.**

**Aim analysis 5:** Influence current MDD on cg27512205 methylation levels in the blood replication sample.

**Linear regression model 5:** cg27512205 methylation ~ Current MDD

| <b>Result 5 cg27512205 ~ Current MDD</b>                                  |                 |                   |                |                    |
|---------------------------------------------------------------------------|-----------------|-------------------|----------------|--------------------|
|                                                                           | <i>Estimate</i> | <i>Std. Error</i> | <i>t value</i> | <i>Pr(&gt; t )</i> |
| MDDTRUE                                                                   | -0.00432        | 0.05627           | -0.077         | 0.939              |
| ---                                                                       |                 |                   |                |                    |
| Signif. codes: 0 '***' 0.001 '**' 0.01 '*' 0.05 '.' 0.1 ' ' 1             |                 |                   |                |                    |
| R-squared: -0.02312 F-statistic: 0.005893 on 1 and 43 DF, p-value: 0.9392 |                 |                   |                |                    |

**Conclusion 5:** Current MDD is not significantly associated with cg27512205 methylation.

**Aim analysis 6:** Influence current MDD on cortisol stress reactivity in the blood replication sample.

**Linear regression model 6:** Cortisol stress reactivity (AUCi) ~ Current MDD

| <b>Result 6 AUCi ~ Current MDD</b>                                       |                 |                   |                |                    |
|--------------------------------------------------------------------------|-----------------|-------------------|----------------|--------------------|
|                                                                          | <i>Estimate</i> | <i>Std. Error</i> | <i>t value</i> | <i>Pr(&gt; t )</i> |
| MDDTRUE                                                                  | -19.45          | 143.20            | -0.136         | 0.893              |
| ---                                                                      |                 |                   |                |                    |
| Signif. codes: 0 '***' 0.001 '**' 0.01 '*' 0.05 '.' 0.1 ' ' 1            |                 |                   |                |                    |
| R-squared: -0.02282 F-statistic: 0.01844 on 1 and 43 DF, p-value: 0.8926 |                 |                   |                |                    |

**Conclusion 6:** Current MDD is not significantly associated with cortisol stress reactivity.

**Aim analysis 7:** Influence current MDD on childhood trauma levels in the blood replication sample.

**Linear regression model 7:** Childhood trauma (CTQ) ~ Current MDD

| <b>Result 7 CTQ ~ Current MDD</b>                                      |                 |                   |                |                    |
|------------------------------------------------------------------------|-----------------|-------------------|----------------|--------------------|
|                                                                        | <i>Estimate</i> | <i>Std. Error</i> | <i>t value</i> | <i>Pr(&gt; t )</i> |
| MDDTRUE                                                                | 26.497          | 7.966             | 3.326          | 0.00181 **         |
| ---                                                                    |                 |                   |                |                    |
| Signif. codes: 0 '***' 0.001 '**' 0.01 '*' 0.05 '.' 0.1 ' ' 1          |                 |                   |                |                    |
| R-squared: 0.1862 F-statistic: 11.06 on 1 and 43 DF, p-value: 0.001808 |                 |                   |                |                    |

**Conclusion 7:** Current MDD is associated with higher childhood trauma levels.

**Stratified analyses for ethnicity were performed to investigate potential confounding in the blood replication sample.**

**Aim analysis 8:** Examine the relationship between childhood trauma and cortisol stress reactivity in the Caucasian subset (N=17).

**Linear regression model 8:** Cortisol stress reactivity (AUCi) ~ Childhood trauma (CTQ) + Gender + Age

| <b>Result 8 AUCi ~CTQ in Caucasian individuals(N=17)</b>              |                 |                   |                |                    |
|-----------------------------------------------------------------------|-----------------|-------------------|----------------|--------------------|
|                                                                       | <i>Estimate</i> | <i>Std. Error</i> | <i>t value</i> | <i>Pr(&gt; t )</i> |
| CTQtotal                                                              | -7.920          | 2.168             | -3.653         | 0.002920 **        |
| GenderMale                                                            | 134.828         | 148.758           | 0.906          | 0.381239           |
| age                                                                   | -6.458          | 13.245            | -0.488         | 0.633960           |
| ---                                                                   |                 |                   |                |                    |
| Signif. codes: 0 '***' 0.001 '**' 0.01 '*' 0.05 '.' 0.1 ' ' 1         |                 |                   |                |                    |
| R-squared: 0.4158 F-statistic: 4.795 on 3 and 13 DF, p-value: 0.01836 |                 |                   |                |                    |

**Conclusion 8:** In the Caucasian individuals(N=17) childhood trauma is associated with blunted cortisol stress reactivity.

**Aim analysis 9:** Examine the relationship between childhood trauma and cg27512205 methylation in the Caucasian subset (N=17).

**Linear regression model 9:** cg27512205 methylation ~ Childhood trauma (CTQ) + Gender + Age

| <b>Result 9 cg27512205 ~CTQ in Caucasian individuals(N=17)</b>         |                 |                   |                |                    |
|------------------------------------------------------------------------|-----------------|-------------------|----------------|--------------------|
|                                                                        | <i>Estimate</i> | <i>Std. Error</i> | <i>t value</i> | <i>Pr(&gt; t )</i> |
| CTQtotal                                                               | 0.0022236       | 0.0007355         | 3.023          | 0.00979 **         |
| GenderMale                                                             | 0.1242792       | 0.0504679         | 2.463          | 0.02853 *          |
| age                                                                    | -0.0093013      | 0.0044935         | -2.070         | 0.05893 .          |
| ---                                                                    |                 |                   |                |                    |
| Signif. codes: 0 '***' 0.001 '**' 0.01 '*' 0.05 '.' 0.1 ' ' 1          |                 |                   |                |                    |
| R-squared: 0.5051 F-statistic: 6.444 on 3 and 13 DF, p-value: 0.006569 |                 |                   |                |                    |

**Conclusion 9:** In the Caucasian individuals(N=17) childhood trauma is associated with cg27512205 methylation.

**Aim analysis 10:** Examine the relationship between cg27512205 methylation and cortisol stress reactivity in the Caucasian subset (N=17).

**Linear regression model 10:** Cortisol stress reactivity (AUCi) ~cg27512205 methylation + Gender + Age

| <b>Result 10 AUCi ~ cg27512205 in Caucasian individuals(N=17)</b>     |                 |                   |                |                    |
|-----------------------------------------------------------------------|-----------------|-------------------|----------------|--------------------|
|                                                                       | <i>Estimate</i> | <i>Std. Error</i> | <i>t value</i> | <i>Pr(&gt; t )</i> |
| cg27512205                                                            | -1960.96        | 706.75            | -2.775         | 0.01578 *          |
| GenderMale                                                            | 386.03          | 187.84            | 2.055          | 0.06054 .          |
| age                                                                   | -22.26          | 16.70             | -1.332         | 0.20562            |
| ---                                                                   |                 |                   |                |                    |
| Signif. codes: 0 '***' 0.001 '**' 0.01 '*' 0.05 '.' 0.1 ' ' 1         |                 |                   |                |                    |
| R-squared: 0.2564 F-statistic: 2.839 on 3 and 13 DF, p-value: 0.07911 |                 |                   |                |                    |

**Conclusion 10:** In the Caucasian individuals(N=17) cg27512205 methylation is associated with blunted cortisol stress reactivity.

**Aim analysis 11:** Examine the relationship between childhood trauma and cortisol stress reactivity in the Afro-American subset (N=23).

**Linear regression model 11:** Cortisol stress reactivity (AUCi) ~ Childhood trauma (CTQ) + Gender + Age

| <b>Result 11 AUCi ~CTQ in Afro-American individuals(N=23)</b>         |                 |                   |                |                    |
|-----------------------------------------------------------------------|-----------------|-------------------|----------------|--------------------|
|                                                                       | <i>Estimate</i> | <i>Std. Error</i> | <i>t value</i> | <i>Pr(&gt; t )</i> |
| CTQtotal                                                              | 3.075           | 4.021             | 0.765          | 0.4538             |
| GenderMale                                                            | 395.486         | 213.005           | 1.857          | 0.0789 .           |
| age                                                                   | -5.913          | 9.767             | -0.605         | 0.5521             |
| ---                                                                   |                 |                   |                |                    |
| Signif. codes: 0 '***' 0.001 '**' 0.01 '*' 0.05 '.' 0.1 ' ' 1         |                 |                   |                |                    |
| R-squared: 0.02171 F-statistic: 1.163 on 3 and 19 DF, p-value: 0.3499 |                 |                   |                |                    |

**Conclusion 11:** In the Afro-American individuals(N=23) childhood trauma is not significantly associated with blunted cortisol stress reactivity.

**Aim analysis 12:** Examine the relationship between childhood trauma and cg27512205 methylation in the Afro-American subset (N=23).

**Linear regression model 12:** cg27512205 methylation ~ Childhood trauma (CTQ) + Gender + Age

| <b>Result 12 cg27512205 ~CTQ in Afro-American individuals(N=23)</b>   |                 |                   |                |                    |
|-----------------------------------------------------------------------|-----------------|-------------------|----------------|--------------------|
|                                                                       | <i>Estimate</i> | <i>Std. Error</i> | <i>t value</i> | <i>Pr(&gt; t )</i> |
| CTQtotal                                                              | -0.001558       | 0.001794          | -0.868         | 0.396              |
| GenderMale                                                            | -0.195203       | 0.095030          | -2.054         | 0.054 .            |
| age                                                                   | 0.004530        | 0.004357          | 1.039          | 0.312              |
| ---                                                                   |                 |                   |                |                    |
| Signif. codes: 0 '***' 0.001 '**' 0.01 '*' 0.05 '.' 0.1 ' ' 1         |                 |                   |                |                    |
| R-squared: 0.06702 F-statistic: 1.527 on 3 and 19 DF, p-value: 0.2399 |                 |                   |                |                    |

**Conclusion 12:** In the Afro-American individuals(N=23) childhood trauma is not significantly associated with cg27512205 methylation.

**Aim analysis 13:** Examine the relationship between cg27512205 methylation and cortisol stress reactivity in the Afro-American subset (N=23).

**Linear regression model 13:** Cortisol stress reactivity (AUCi) ~cg27512205 methylation + Gender + Age

| <b>Result 13 AUCi ~ cg27512205 in Afro-American individuals(N=23)</b> |                 |                   |                |                    |
|-----------------------------------------------------------------------|-----------------|-------------------|----------------|--------------------|
|                                                                       | <i>Estimate</i> | <i>Std. Error</i> | <i>t value</i> | <i>Pr(&gt; t )</i> |
| cg27512205                                                            | -745.182        | 482.636           | -1.544         | 0.13908            |
| GenderMale                                                            | 210.845         | 203.878           | 1.034          | 0.31404            |
| age                                                                   | -2.139          | 9.531             | -0.224         | 0.82483            |
| ---                                                                   |                 |                   |                |                    |
| Signif. codes: 0 '***' 0.001 '**' 0.01 '*' 0.05 '.' 0.1 ' ' 1         |                 |                   |                |                    |
| R-squared: 0.104 F-statistic: 1.851 on 3 and 19 DF, p-value: 0.1722   |                 |                   |                |                    |

**Conclusion 13:** In the Afro-American individuals(N=23) cg27512205 methylation is not significantly associated with cortisol stress reactivity.

**Stratified analyses for current MDD were performed to investigate potential confounding in the blood replication sample.**

**Aim analysis 14:** Examine the relationship between childhood trauma and cortisol stress reactivity in the individuals without current MDD(N=34).

**Linear regression model 14:** Cortisol stress reactivity (AUCi) ~ Childhood trauma (CTQ) + Gender + Age

| <b>Result 14 AUCi ~CTQ in current non-MDD individuals(N=34)</b>       |                 |                   |                |                    |
|-----------------------------------------------------------------------|-----------------|-------------------|----------------|--------------------|
|                                                                       | <i>Estimate</i> | <i>Std. Error</i> | <i>t value</i> | <i>Pr(&gt; t )</i> |
| CTQtotal                                                              | -4.528          | 2.799             | -1.618         | 0.116              |
| GenderMale                                                            | 231.053         | 149.441           | 1.546          | 0.133              |
| age                                                                   | -7.924          | 8.941             | -0.886         | 0.382              |
| ---                                                                   |                 |                   |                |                    |
| Signif. codes: 0 '***' 0.001 '**' 0.01 '*' 0.05 '.' 0.1 ' ' 1         |                 |                   |                |                    |
| R-squared: 0.08806 F-statistic: 2.062 on 3 and 30 DF, p-value: 0.1263 |                 |                   |                |                    |

**Conclusion 14:** In the individuals without current MDD(N=34) childhood trauma is not significantly associated with cortisol stress reactivity.

**Aim analysis 15:** Examine the relationship between childhood trauma and cg27512205 methylation in the individuals without current MDD(N=34).

**Linear regression model 15:** cg27512205 methylation ~ Childhood trauma (CTQ) + Gender + Age

| <b>Result 15 cg27512205 ~CTQ in current non-MDD individuals(N=34)</b>    |                 |                   |                |                    |
|--------------------------------------------------------------------------|-----------------|-------------------|----------------|--------------------|
|                                                                          | <i>Estimate</i> | <i>Std. Error</i> | <i>t value</i> | <i>Pr(&gt; t )</i> |
| CTQtotal                                                                 | 0.001782        | 0.001059          | 1.683          | 0.103              |
| GenderMale                                                               | 0.006236        | 0.056527          | 0.110          | 0.913              |
| age                                                                      | -0.001853       | 0.003382          | -0.548         | 0.588              |
| R-squared: -0.001786 F-statistic: 0.9804 on 3 and 30 DF, p-value: 0.4151 |                 |                   |                |                    |

**Conclusion 15:** In the individuals without current MDD(N=34) childhood trauma is not significantly associated with cg27512205 methylation.

**Aim analysis 16:** Examine the relationship between cg27512205 methylation and cortisol stress reactivity in the individuals without current MDD(N=34).

**Linear regression model 16:** Cortisol stress reactivity (AUCi) ~cg27512205 methylation + Gender + Age

| <b>Result 16 AUCi ~ cg27512205 in current non-MDD individuals(N=34)</b> |                 |                   |                |                    |
|-------------------------------------------------------------------------|-----------------|-------------------|----------------|--------------------|
|                                                                         | <i>Estimate</i> | <i>Std. Error</i> | <i>t value</i> | <i>Pr(&gt; t )</i> |
| cg27512205                                                              | -1014.161       | 444.028           | -2.284         | 0.0296 *           |
| GenderMale                                                              | 244.389         | 143.654           | 1.701          | 0.0992 .           |
| age                                                                     | -10.946         | 8.544             | -1.281         | 0.2099             |
| ---                                                                     |                 |                   |                |                    |
| Signif. codes: 0 '***' 0.001 '**' 0.01 '*' 0.05 '.' 0.1 ' ' 1           |                 |                   |                |                    |
| R-squared: 0.1554 F-statistic: 3.023 on 3 and 30 DF, p-value: 0.04494   |                 |                   |                |                    |

**Conclusion 16:** In the individuals without current MDD(N=34) cg27512205 methylation is associated with blunted cortisol stress reactivity.

**Aim analysis 17:** Examine the relationship between childhood trauma and cortisol stress reactivity in the individuals with current MDD(N=11). All female so no gender covariate.

**Linear regression model 17:** Cortisol stress reactivity (AUCi) ~ Childhood trauma (CTQ) + Age



**Result 17 AUCi ~CTQ in current MDD individuals(N=11)**

|          | <i>Estimate</i> | <i>Std. Error</i> | <i>t value</i> | <i>Pr(&gt; t )</i> |
|----------|-----------------|-------------------|----------------|--------------------|
| CTQtotal | -11.410         | 7.313             | -1.560         | 0.1573             |
| age      | -27.607         | 33.108            | -0.834         | 0.4286             |

---

Signif. codes: 0 '\*\*\*' 0.001 '\*\*' 0.01 '\*' 0.05 '.' 0.1 ' ' 1

Adjusted R-squared: 0.06998 F-statistic: 1.376 on 2 and 8 DF, p-value: 0.3064

**Conclusion 17:** In the individuals with current MDD(N=34) childhood trauma is not significantly associated with cortisol stress reactivity.

**Aim analysis 18:** Examine the relationship between childhood trauma and cg27512205 methylation in the individuals with current MDD(N=11). All female so no gender covariate.

**Linear regression model 18:** cg27512205 methylation ~ Childhood trauma (CTQ) + Age

**Result 18 cg27512205 ~CTQ in current MDD individuals(N=11)**

|          | <i>Estimate</i> | <i>Std. Error</i> | <i>t value</i> | <i>Pr(&gt; t )</i> |
|----------|-----------------|-------------------|----------------|--------------------|
| CTQtotal | 0.001441        | 0.002713          | 0.531          | 0.610              |
| age      | 0.012779        | 0.012282          | 1.040          | 0.329              |

R-squared: -0.08629 F-statistic: 0.6028 on 2 and 8 DF, p-value: 0.5704

**Conclusion 18:** In the individuals with current MDD(N=11) childhood trauma is not significantly associated with cg27512205 methylation.

**Aim analysis 19:** Examine the relationship between cg27512205 methylation and cortisol stress reactivity in the individuals with current MDD(N=11). All female so no gender covariate

**Linear regression model 19:** Cortisol stress reactivity (AUCi) ~cg27512205 methylation + Age

**Result 19 AUCi ~ cg27512205 in current MDD individuals(N=11)**

|                | <i>Estimate</i> | <i>Std. Error</i> | <i>t value</i> | <i>Pr(&gt; t )</i> |
|----------------|-----------------|-------------------|----------------|--------------------|
| res_cg27512205 | -1885.263       | 836.654           | -2.253         | 0.0543 .           |
| age            | 3.517           | 30.677            | 0.115          | 0.9116             |

---

Signif. codes: 0 '\*\*\*' 0.001 '\*\*' 0.01 '\*' 0.05 '.' 0.1 ' ' 1

R-squared: 0.258 F-statistic: 2.738 on 2 and 8 DF, p-value: 0.1242

**Conclusion 19:** In the individuals with current MDD(N=11) cg27512205 methylation is not significantly associated with blunted cortisol stress reactivity.

**To establish the influence of current MDD and ethnicity, they were added as covariates to the model examining the association between KITLG and cortisol stress reactivity in the blood replication sample.**

**Aim analysis 20:** Influence current MDD and ethnicity on the model examining the association between cg27512205 methylation levels and cortisol stress reactivity in the blood replication sample.

**Linear regression model 20:** Cortisol stress reactivity (AUCi) ~ methylation cg27512205 + Gender + age + Race + MDD

| <b>Result 20 AUCi ~ cg27512205 in all individuals (N=45)</b>           |                 |                   |                |                    |
|------------------------------------------------------------------------|-----------------|-------------------|----------------|--------------------|
|                                                                        | <i>Estimate</i> | <i>Std. Error</i> | <i>t value</i> | <i>Pr(&gt; t )</i> |
| cg27512205                                                             | -1039.583       | 358.600           | -2.899         | 0.006187 **        |
| GenderMale                                                             | 213.211         | 134.351           | 1.587          | 0.120809           |
| age                                                                    | -1.501          | 7.980             | -0.188         | 0.851794           |
| RaceCaucasian                                                          | 300.603         | 115.727           | 2.598          | 0.013285 *         |
| RaceOther                                                              | 453.413         | 176.659           | 2.567          | 0.014334 *         |
| MDDTRUE                                                                | -3.643          | 122.702           | -0.030         | 0.976467           |
| ---                                                                    |                 |                   |                |                    |
| Signif. codes: 0 '***' 0.001 '**' 0.01 '*' 0.05 '.' 0.1 ' ' 1          |                 |                   |                |                    |
| R-squared: 0.3278 F-statistic: 4.576 on 6 and 38 DF, p-value: 0.001382 |                 |                   |                |                    |

**Conclusion 20:** The association between cg27512205 methylation levels and cortisol stress reactivity in the blood replication sample remains present after adding ethnicity and current MDD as covariate. Ethnicity is associated with altered cortisol stress responses and an important determinant, therefore ethnicity was added as covariate to all analyses in the blood replication sample.

**Supplementary Note 2: Influence of cell count in the discovery sample**

The association of cellcount with cortisol stress reactivity (analysis 1 on p27), childhood trauma (analysis 2 p28), average methylation (analysis 3 on p29) and *KITLG* methylation (analysis 4 on p30) is examined. Finally, to establish the influence of cellcount on the association between *KITLG* and cortisol stress reactivity, we show the model summary for the entire model (analysis 5 on p31).

**Aim analysis 1:** Association between cellcount and cortisol stress reactivity (AUCi) in the discovery sample (N=85).

**Linear regression model 1:** Cortisol stress reactivity (AUCi) ~ CD8 T cells + Monocytes + Natural Killer cells + CD4 T cells + Bcells

|                                                                         | <b>Result 1 AUCi ~Cellcount</b> |                   |                |                    |
|-------------------------------------------------------------------------|---------------------------------|-------------------|----------------|--------------------|
|                                                                         | <i>Estimate</i>                 | <i>Std. Error</i> | <i>t value</i> | <i>Pr(&gt; t )</i> |
| CD8T                                                                    | -415.8                          | 5641.8            | -0.074         | 0.941              |
| Mono                                                                    | 106.0                           | 2596.5            | 0.041          | 0.968              |
| NK                                                                      | 733.9                           | 1307.2            | 0.561          | 0.576              |
| CD4T                                                                    | -159.7                          | 1257.7            | -0.127         | 0.899              |
| Bcell                                                                   | -1570.0                         | 2047.6            | -0.767         | 0.445              |
| R-squared: -0.04507 F-statistic: 0.2754 on 5 and 79 DF, p-value: 0.9253 |                                 |                   |                |                    |

**Conclusion 1:** Different cellcounts are not significantly associated with cortisol stress reactivity (AUCi) in the discovery sample.

Supplementary information

**Aim analysis 2:** Association between cellcount and childhood trauma in the discovery sample (N=85).

**Linear regression model 2:** Childhood trauma(CTQ) ~ CD8 T cells + Monocytes + Natural Killer cells + CD4 T cells + Bcells

| <b>Result 2 CTQ ~Cellcount</b>                                        |                 |                   |                |                    |
|-----------------------------------------------------------------------|-----------------|-------------------|----------------|--------------------|
|                                                                       | <i>Estimate</i> | <i>Std. Error</i> | <i>t value</i> | <i>Pr(&gt; t )</i> |
| CD8T                                                                  | -13.84346       | 107.14982         | -0.129         | 0.89753            |
| Mono                                                                  | - 0.06564       | 49.31389          | -0.001         | 0.99894            |
| NK                                                                    | 19.01293        | 24.82724          | 0.766          | 0.44607            |
| CD4T                                                                  | 44.29173        | 23.88644          | 1.854          | 0.06743 .          |
| Bcell                                                                 | 33.45139        | 38.88764          | 0.860          | 0.39228            |
| ---                                                                   |                 |                   |                |                    |
| Signif. codes: 0 '***' 0.001 '**' 0.01 '*' 0.05 '.' 0.1 ' ' 1         |                 |                   |                |                    |
| R-squared: 0.01953 F-statistic: 1.335 on 5 and 79 DF, p-value: 0.2583 |                 |                   |                |                    |

**Conclusion 2:** Different cellcounts are not significantly associated with childhood trauma in the discovery sample.

**Aim analysis 3:** Association between cellcount and average DNA methylation in discovery sample (N=85).

**Linear regression model 3:** Average methylation (PC1) ~ CD8 T cells + Monocytes + Natural Killer cells + CD4 T cells + Bcells

| <b>Result 3 Average methylation ~Cellcount</b>                         |                 |                   |                |                    |
|------------------------------------------------------------------------|-----------------|-------------------|----------------|--------------------|
|                                                                        | <i>Estimate</i> | <i>Std. Error</i> | <i>t value</i> | <i>Pr(&gt; t )</i> |
| CD8T                                                                   | -0.018781       | 0.035078          | -0.535         | 0.59387            |
| Mono                                                                   | 0.010193        | 0.016144          | 0.631          | 0.52963            |
| NK                                                                     | 0.021518        | 0.008128          | 2.648          | 0.00979 **         |
| CD4T                                                                   | 0.016304        | 0.007820          | 2.085          | 0.04031 *          |
| Bcell                                                                  | 0.006590        | 0.012731          | 0.518          | 0.60617            |
| ---                                                                    |                 |                   |                |                    |
| Signif. codes: 0 '***' 0.001 '**' 0.01 '*' 0.05 '.' 0.1 ' ' 1          |                 |                   |                |                    |
| R-squared: 0.06489 F-statistic: 2.166 on 5 and 79 DF, p-value: 0.06622 |                 |                   |                |                    |

**Conclusion 3:** Different cellcounts are significantly associated with average DNA methylation levels in the discovery sample.

**Aim analysis 4:** Association between cellcount and cg27512205 DNA methylation in discovery sample (N=85).

**Linear regression model 4:** cg27512205 methylation ~ CD8 T cells + Monocytes + Natural Killer cells + CD4 T cells + Bcells

| <b>Result 4 cg27512205 ~Cellcount</b>                                    |                 |                   |                |                    |
|--------------------------------------------------------------------------|-----------------|-------------------|----------------|--------------------|
|                                                                          | <i>Estimate</i> | <i>Std. Error</i> | <i>t value</i> | <i>Pr(&gt; t )</i> |
| CD8T                                                                     | -2.21662        | 2.27124           | -0.976         | 0.332              |
| Mono                                                                     | 1.12029         | 1.04530           | 1.072          | 0.287              |
| NK                                                                       | -0.05001        | 0.52626           | -0.095         | 0.925              |
| CD4T                                                                     | -0.22508        | 0.50632           | -0.445         | 0.658              |
| Bcell                                                                    | 0.53399         | 0.82430           | 0.648          | 0.519              |
| ---                                                                      |                 |                   |                |                    |
| Signif. codes: 0 '***' 0.001 '**' 0.01 '*' 0.05 '.' 0.1 ' ' 1            |                 |                   |                |                    |
| R-squared: -0.007898 F-statistic: 0.8684 on 5 and 79 DF, p-value: 0.5063 |                 |                   |                |                    |

**Conclusion 4:** Different cellcounts are not significantly associated with cg27512205 DNA methylation levels in the discovery sample.

**Aim analysis 5:** Association between cortisol stress reactivity and cg27512205 DNA methylation when cellcounts are included as covariates in discovery sample (N=85).

**Linear regression model 5:** Cortisol stress reactivity (AUCi) ~ cg27512205 methylation + Gender + age + CD8 T cells + Monocytes + Natural Killer cells + CD4 T cells + Bcells

| <b>Result 5 AUCi ~ cg27512205 +gender+age+ cellcount</b>                |                 |                   |                |                    |
|-------------------------------------------------------------------------|-----------------|-------------------|----------------|--------------------|
|                                                                         | <i>Estimate</i> | <i>Std. Error</i> | <i>t value</i> | <i>Pr(&gt; t )</i> |
| cg27512205                                                              | -1124.268       | 228.417           | -4.922         | 4.85e-06 ***       |
| GenderMale                                                              | -327.472        | 78.776            | -4.157         | 8.38e-05 ***       |
| age                                                                     | 3.502           | 2.570             | 1.363          | 0.177059           |
| CD8T                                                                    | 845.056         | 4700.716          | 0.180          | 0.857810           |
| CD4T                                                                    | -108.060        | 1066.305          | -0.101         | 0.919547           |
| NK                                                                      | 508.869         | 1072.352          | 0.475          | 0.636479           |
| Bcell                                                                   | 273.679         | 1709.032          | 0.160          | 0.873198           |
| Mono                                                                    | 1819.355        | 2124.956          | 0.856          | 0.394587           |
| ---                                                                     |                 |                   |                |                    |
| Signif. codes: 0 '***' 0.001 '**' 0.01 '*' 0.05 '.' 0.1 ' ' 1           |                 |                   |                |                    |
| R-squared: 0.3123 F-statistic: 5.768 on 8 and 76 DF, p-value: 9.672e-06 |                 |                   |                |                    |

**Conclusion 5:** The association between cortisol stress reactivity and cg27512205 DNA methylation levels remains when cellcounts are added as covariates in the discovery sample.

**Supplementary Note 3: Summary of the *KITLG* model in the cross-tissue replication sample**

**Aim analysis 1:** Association between cg27512205 DNA methylation and cortisol stress reactivity in the cross-tissue replication sample (N=255).

**Linear regression model 1:** Cortisol stress reactivity (AUCi) ~ cg27512205 methylation +Gender + age

| <b>Result 1 AUCi ~ cg27512205 +gender+age</b>                           |                 |                   |                |                    |
|-------------------------------------------------------------------------|-----------------|-------------------|----------------|--------------------|
|                                                                         | <i>Estimate</i> | <i>Std. Error</i> | <i>t value</i> | <i>Pr(&gt; t )</i> |
| cg27512205                                                              | -104.038        | 35.373            | -2.941         | 0.00358 **         |
| age                                                                     | -4.835          | 13.871            | -0.349         | 0.72771            |
| GenderMale                                                              | 11.691          | 11.664            | 1.002          | 0.31716            |
| ---                                                                     |                 |                   |                |                    |
| Signif. codes: 0 '***' 0.001 '**' 0.01 '*' 0.05 '.' 0.1 ' ' 1           |                 |                   |                |                    |
| R-squared: 0.02855 F-statistic: 3.489 on 3 and 251 DF, p-value: 0.01638 |                 |                   |                |                    |

**Conclusion 1:** Cg27512205 DNA methylation levels are associated with cortisol stress reactivity in the cross-tissue sample.



**Supplementary References**

1. Barfield,R.T. *et al.* Accounting for population stratification in DNA methylation studies. *Genet. Epidemiol.* **38**, 231-241 (2014).
2. Carpenter,L.L. *et al.* Decreased adrenocorticotropic hormone and cortisol responses to stress in healthy adults reporting significant childhood maltreatment. *Biol. Psychiatry* **62**, 1080-1087 (2007).
3. Carpenter,L.L., Shattuck,T.T., Tyrka,A.R., Geraciotti,T.D., & Price,L.H. Effect of childhood physical abuse on cortisol stress response. *Psychopharmacology (Berl)* **214**, 367-375 (2011).
4. Elzinga,B.M. *et al.* Diminished cortisol responses to psychosocial stress associated with lifetime adverse events a study among healthy young subjects. *Psychoneuroendocrinology* **33**, 227-237 (2008).
5. Heim,C. *et al.* Pituitary-adrenal and autonomic responses to stress in women after sexual and physical abuse in childhood. *JAMA* **284**, 592-597 (2000).
6. Moran-Santa Maria,M.M. *et al.* Influence of cocaine dependence and early life stress on pituitary-adrenal axis responses to CRH and the Trier social stressor. *Psychoneuroendocrinology* **35**, 1492-1500 (2010).
7. Pesonen,A.K. *et al.* Childhood separation experience predicts HPA axis hormonal responses in late adulthood: a natural experiment of World War II. *Psychoneuroendocrinology* **35**, 758-767 (2010).
8. Witt,S.H. *et al.* An interaction between a neuropeptide Y gene polymorphism and early adversity modulates endocrine stress responses. *Psychoneuroendocrinology* **36**, 1010-1020 (2011).
9. Buchmann,A.F. *et al.* Moderating role of FKBP5 genotype in the impact of childhood adversity on cortisol stress response during adulthood. *Eur. Neuropsychopharmacol.* **24**, 837-845 (2014).
10. Kraft,A.J. & Luecken,L.J. Childhood parental divorce and cortisol in young adulthood: evidence for mediation by family income. *Psychoneuroendocrinology* **34**, 1363-1369 (2009).
11. Luecken,L.J. Childhood attachment and loss experiences affect adult cardiovascular and cortisol function. *Psychosom. Med.* **60**, 765-772 (1998).
12. Otte,C. *et al.* Association between childhood trauma and catecholamine response to psychological stress in police academy recruits. *Biol. Psychiatry* **57**, 27-32 (2005).
13. Goldman-Mellor,S., Hamer,M., & Steptoe,A. Early-life stress and recurrent psychological distress over the lifecourse predict divergent cortisol reactivity patterns in adulthood. *Psychoneuroendocrinology* **37**, 1755-1768 (2012).
14. Elzinga,B.M., Spinhoven,P., Berretty,E., de,J.P., & Roelofs,K. The role of childhood abuse in HPA-axis reactivity in Social Anxiety Disorder: a pilot study. *Biol. Psychol.* **83**, 1-6 (2010).
15. Vidlock,E.J. *et al.* Childhood trauma is associated with hypothalamic-pituitary-adrenal axis responsiveness in irritable bowel syndrome. *Gastroenterology* **137**, 1954-1962 (2009).

Supplementary information

16. Bremner, J.D. *et al.* Cortisol response to a cognitive stress challenge in posttraumatic stress disorder (PTSD) related to childhood abuse. *Psychoneuroendocrinology* **28**, 733-750 (2003).
17. Santa Ana, E.J. *et al.* PTSD and the HPA axis: differences in response to the cold pressor task among individuals with child vs. adult trauma. *Psychoneuroendocrinology* **31**, 501-509 (2006).
